# Supplementary material
Source: publisher site journal article supplement (https://www.spandidos-publications.com/2455/downloadSupplementary)

Figure S1. Original figure for the highly expressed ANLN-related pathway: The neuroactive ligand receptor interaction pathway.

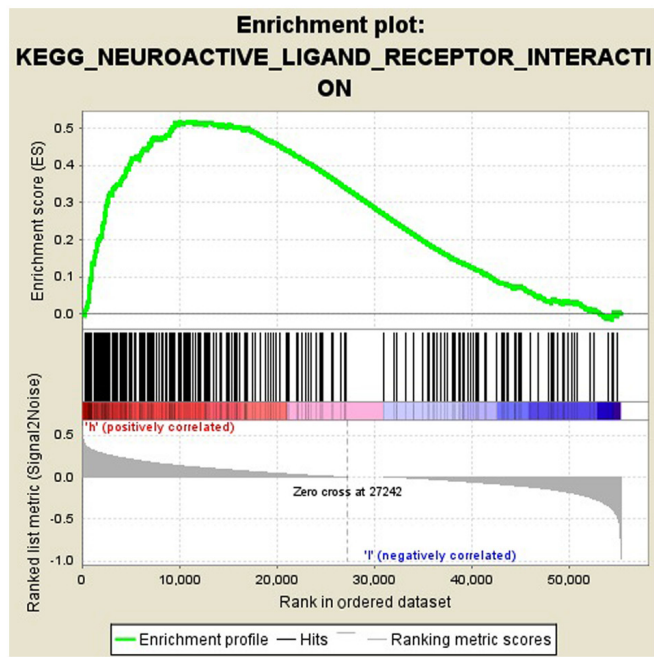

Figure S2. Original figure on the low expression ANLN-related pathway: The p53 signalling pathway.

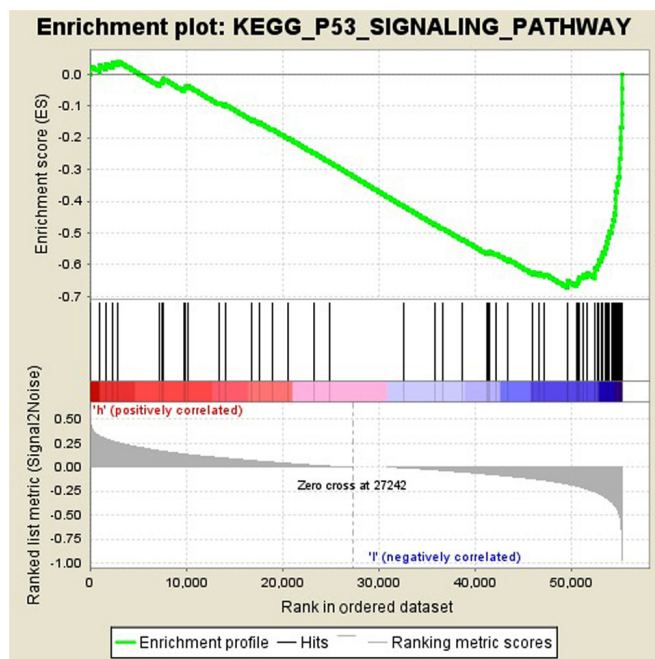

Figure S3. Original figure on the low expression ANLN-related pathway: The cell cycle.

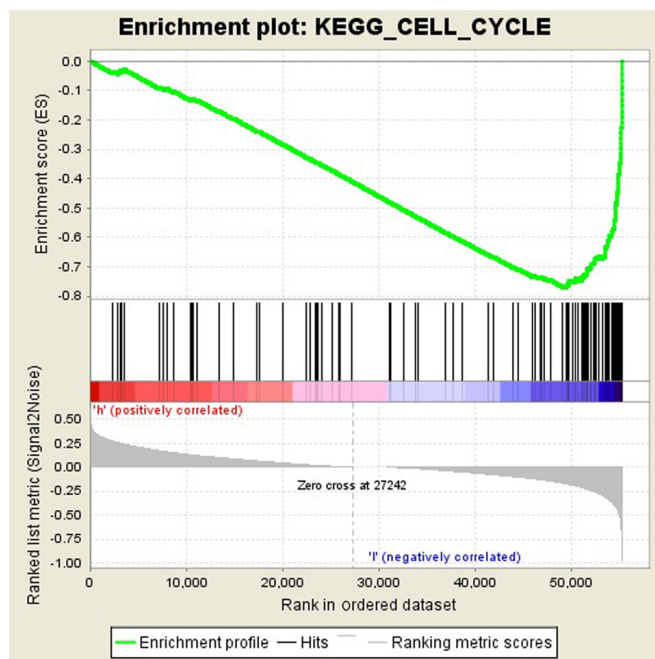

Figure S4. Original figure on the low expression ANLN-related pathway: DNA replication.

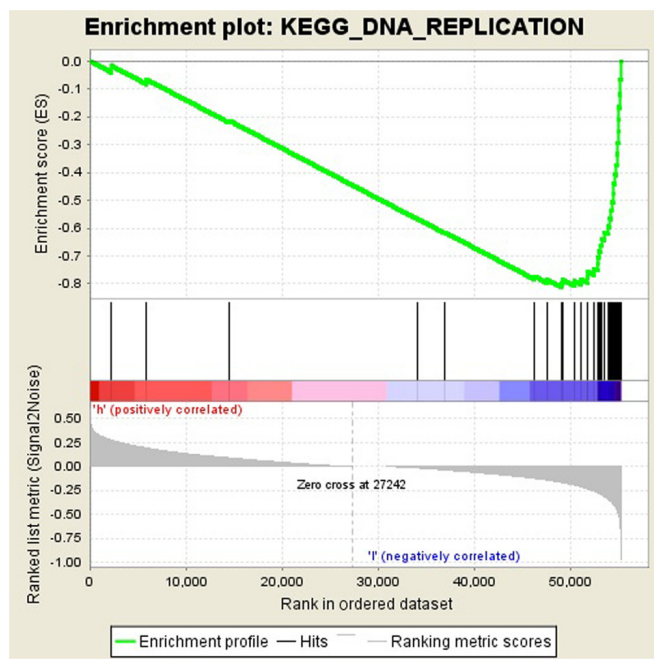

Figure S5. Original figure on the low expression ANLN-related pathway: Mismatch repair.

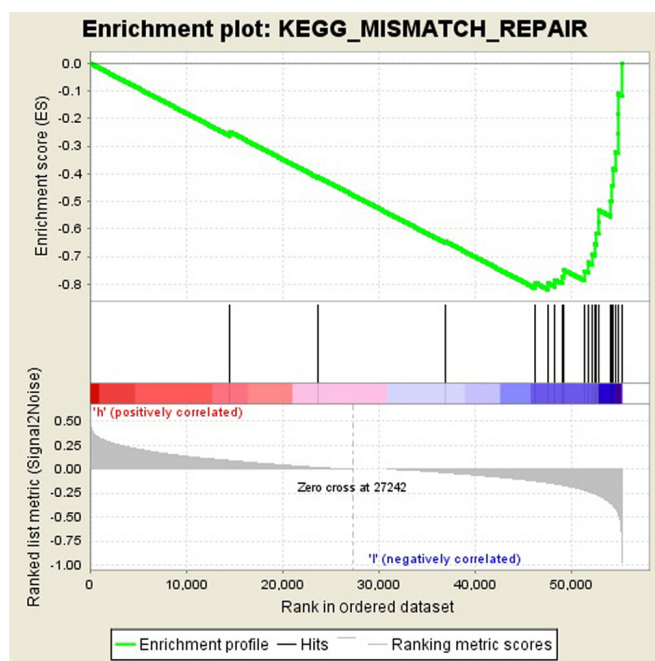

Figure S6. Original figure on the low expression ANLN-related pathway: Nucleotide excision repair.

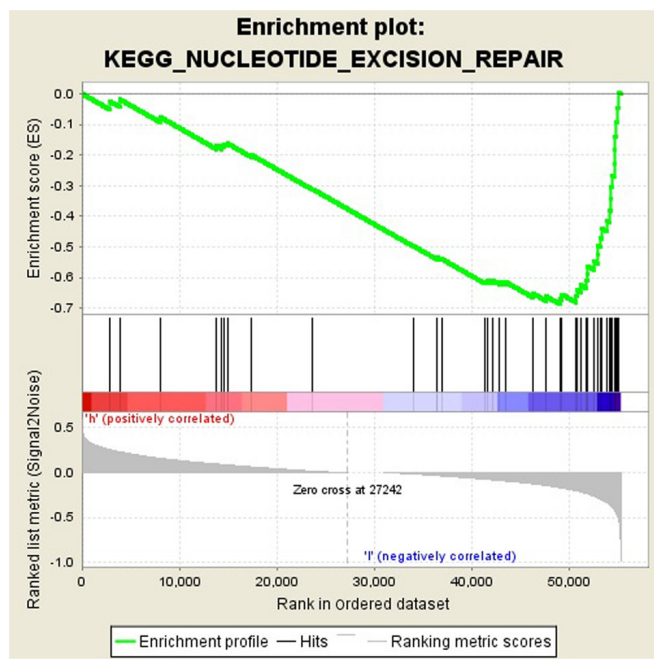

Figure S7. Original figure on the low expression ANLN-related pathway: Pancreatic cancer.

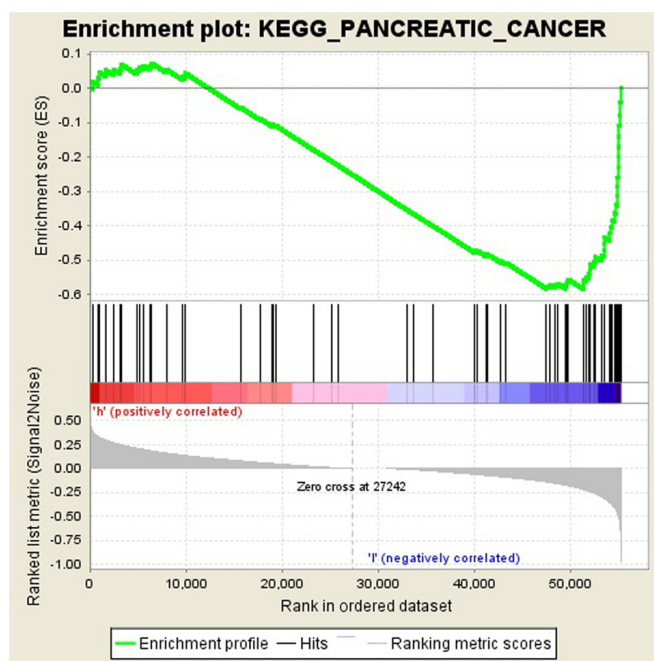

Supplement: Supplementary file 1 [file downloadSupplementary]
